# Supplementary material for: Anaerobic self-induced Fermentation: A Green Bioprocessing Strategy for Enhancing Extraction Efficiency and Bioactivities of Flavonoids from Erigeron breviscapus (Vant.) Hand-Mazz
Source: Research Square preprint supplement (doi:10.21203/rs.3.rs-7619653/v1), 2025-10-20
Supplement: Supplementary file 1 [file 38f00efc1892bd903f11ed10.pdf]

Ref: 253415

Permission is granted to Scientific Reports of Springer Nature Ltd to publish both in print and digital under the CC BY 4.0 open access license the result of using KEGG and the following KEGG images in the article "Anaerobic self-induced Fermentation: A Green Bioprocessing Strategy for Enhancing Extraction Efficiency and Bioactivities of Flavonoids from *Erigeron breviscapus* (Vant.) Hand-Mazz" written by xianghau shu and colleagues:

- |                                                     |                                                         |
|-----------------------------------------------------|---------------------------------------------------------|
| - Glycolysis / Gluconeogenesis (map00010)           | - Citrate cycle (TCA cycle) (map00020)                  |
| - Pentose phosphate pathway (map00030)              | - Glyoxylate and dicarboxylate metabolism (map00630)    |
| - Pyruvate metabolism (map00620)                    | - Oxidative phosphorylation (map00190)                  |
| - Photosynthesis (map00195)                         | - Photosynthesis - antenna proteins (map00196)          |
| - Biosynthesis of amino acids (map01230)            | - Valine, leucine and isoleucine degradation (map00280) |
| - Arginine biosynthesis (map00220)                  | - Tyrosine metabolism (map00350)                        |
| - Phenylalanine metabolism (map00360)               | - Purine metabolism (map00230)                          |
| - Nucleotide metabolism (map01232)                  | - Riboflavin metabolism (map00740)                      |
| - Nicotinate and nicotinamide metabolism (map00760) | - Glutathione metabolism (map00480)                     |
| - Biosynthesis of cofactors (map01240)              | - Fatty acid biosynthesis (map00061)                    |
| - Fatty acid degradation (map00071)                 | - Carbon metabolism (map01200)                          |
| - Phenylpropanoid biosynthesis (map00940)           | - Flavonoid biosynthesis (map00941)                     |
| - Anthocyanin biosynthesis (map00942)               | - Flavone and flavonol biosynthesis (map00944)          |
| - Plant hormone signal transduction (map04075)      | - ABC transporters (map02010)                           |

subject to the condition that the original source is acknowledged by citing at least one KEGG paper.

Permission granted:



Naomi Takahashi, Kanehisa Laboratories

Date: 23 September 2025

Copyright holder: Kanehisa Laboratories
