# Supplementary material for: Anaerobic self-induced Fermentation: A Green Bioprocessing Strategy for Enhancing Extraction Efficiency and Bioactivities of Flavonoids from Erigeron breviscapus (Vant.) Hand-Mazz
Source: Research Square preprint supplement (doi:10.21203/rs.3.rs-7619653/v1), 2025-10-20
Supplement: Supplementary file 1 [file 27462cd6ad3bd1ff7de7018a.xlsx]

## Sheet: Sheet 1
id
