# Supplementary material for: Anaerobic self-induced Fermentation: A Green Bioprocessing Strategy for Enhancing Extraction Efficiency and Bioactivities of Flavonoids from Erigeron breviscapus (Vant.) Hand-Mazz
Source: Research Square preprint supplement (doi:10.21203/rs.3.rs-7619653/v1), 2025-10-20
Supplement: Supplementary file 2 [file f290630dba2bf36c101745bf.xlsx]

## Sheet: file explanation
Column Header	Description
id	The unique data identifier of this substance in the current qualitative analys
compound name	Substance name identified by mass spectrometry qualitative matching analys
NAME_CH	No description available
CAS	No description available
KEGG_ID	No description available
FORMULA	No description available
EXACT_MASS	No description available
CLASS_EN	No description available
CLASS_CH	No description available
Q1	No description available
Q3	No description available
ionmode	No description available
rt	The chromatographic retention time of the substance
VIP	The variable importance in projection (VIP) of this substance in the OPLS-DA model for the group comparison
P-VALUE	The p-value of this substance in the t-test for the group comparison represents the probability of rejecting the null hypothesis when it is actually true (Type I error). It can be interpreted as the ratio of false negative results to the total number of tests, serving as a statistical measure to evaluate the sample data.
Q-VALUE	The q-value, obtained after multiple hypothesis testing correction of the test statistic (p-value), represents the probability of rejecting the null hypothesis when it is actually true (false discovery rate). It is calculated as the proportion of false positive results among all results deemed significant, serving as a measure to evaluate the reliability of statistical inferences and a statistica…
FOLD CHANGE	The fold change of this substance between the two experimental groups being compared.
LOG_FOLDCHANGE	Fold change expressed as the base-2 logarithm (log2 fold change).”
Group	Name of the comparison group
Cpd_all	Total number of detected substances
Cpd_diff	Number of differential substances in the group comparison
Cpd_diff_up	Number of upregulated differential substances in the group comparison
Cpd_diff_down	Number of downregulated differential substances in the group comparis
FT1	Relative quantification value of FT1 sample
FT2	Relative quantification value of FT2 sample
FT3	Relative quantification value of FT3 sample”
Mean B	Mean relative quantification value of replicate experiments for sample B
YT1	YT1 sample relative quantification
YT2	YT2 sample relative quantification
YT3	YT3 sample relative quantification
Mean A	Average relative quantification of replicates for sample A
	The criteria for screening differential metabolites in this study were VIP > 1 and p-value < 0.05

## Sheet: Up- and down-regulation summary
Group	Cpd_all	Cpd_diff	Cpd_diff_up	Cpd_diff_down
AvsB	710	223	156	67

## Sheet: AvsB
compound name	CAS	FORMULA	CLASS_EN	Q-VALUE	FOLD CHANGE
(+)-Abscisic acid	21293-29-8	C15H20O4	phytohormone	0.0120387	0.335275
Gibberellin A7	510-75-8	C19H22O5	phytohormone	0.121262	1.91369
Narcissoside	604-80-8	C28H32O16	flavonoids	0.0389373	0.0142425
(±)-Jasmonic acid	77026-92-7	C12H18O3	phytohormone	0.0818547	0.440864
N-((-)-jasmonoyl)-S-isoleucine	120330-92-9	C18H29NO4	phytohormone	0.00351137	0.267532
Genistein	446-72-0	C15H10O5	flavonoids	0.0925015	6.19997
Diosmetin	520-34-3	C16H12O6	flavonoids	0.0875937	11.7046
Hesperetin	520-33-2	C16H14O6	flavonoids	0.0818547	7.89296
N6-isopentenyladenosine	7724-76-7	C15H21N5O4	phytohormone	0.0818547	14.4086
trans-Zeatin-riboside	6025-53-2	C15H21N5O5	phytohormone	0.0045026	5.47429
Luteolin	491-70-3	C15H10O6	flavonoids	0.0725822	12.1612
Glycitin	40246-10-4	C22H22O10	flavonoids	0.0126629	4.5534
Cynaroside	5373-11-5	C21H20O11	flavonoids	0.0363464	1.41158
Rhoifolin	17306-46-6	C27H30O14	flavonoids	0.0624887	0.0336995
Kaempferol-3-O-rutinoside	17650-84-9	C27H30O15	flavonoids	0.0287581	0.0376959
Rutin	153-18-4	C27H30O16	flavonoids	0.0376376	0.00816364
Isorhamnetin	480-19-3	C16H12O7	flavonoids	0.0908387	61.2593
L-Valine	72-18-4	C5H11NO2	Amino acid and derivatives;amino acids	0.155372	0.792049
L-Histidine	71-00-1	C6H9N3O2	Amino acid and derivatives;amino acids	0.0725822	1.82523
Umbelliferone	93-35-6	C9H6O3	Phenylpropanoids	0.0766337	1.97832
Fumaric acid	110-17-8	C4H4O4	Organic acids and derivatives	0.0321949	1.59098
1H-Indole-3-carboxylic acid;Indole-3-carboxylic	771-50-6	C9H7NO2	Alkaloids	0.0725822	1.697
Emodin	518-82-1	C15H10O5	Anthraquinones	0.0184905	0.120414
D-(-)-Quinic acid	77-95-2	C7H12O6	Quinolines and derivatives	0.0126629	3.39741
Psychosine	2238-90-6	C24H47NO7	Sphingolipids	0.0705792	0.166469
Ginkgolic acid C15:1	22910-60-7	C22H34O3	Phenols	0.109727	7.92293
Bergenin	477-90-7	C14H16O9	Phenols	0.079768	61.3898
Loganic acid;Loganic acid	22255-40-9	C16H24O10	Iridoids	0.0253001	0.236453
Hydroxyphenyllactic acid	306-23-0	C9H10O4	Phenylpropanoids	0.0624887	49.0055
Indoleacetaldehyde	2591-98-2	C10H9NO	Indoles and derivatives	0.0925015	0.491102
Cyanidin 3-O-glucoside	7084-24-4	C21H20O11	Flavonoids	0.0204415	0.390957
4-Beta-Hydroxycholesterol	17320-10-4	C27H46O2	Steroids	0.155575	6.52402
4-Pyridoxic acid	82-82-6	C8H9NO4	Pyridine derivatives	0.0725822	2.77179
Rhein	478-43-3	C15H8O6	Anthraquinones	0.0197402	4.00656
Alpha-Lactose	63-42-3	C12H22O11	Organooxygen compounds	0.0653053	12.2421
Trehalose	99-20-7	C12H22O11	Organooxygen compounds	0.0725822	10.0848
Geranylacetone	6809-52-5	C23H38O	Prenol lipids	0.155575	1.78573
Malonic acid	141-82-2	C3H4O4	Carboxylic acids and derivatives	0.0894201	3.78472
Gentisic acid	490-79-9	C7H6O4	Phenols	0.0197402	1.96335
Isoeugenol	97-54-1	C10H12O2	Phenols	0.0725822	0.0103887
Pyrophosphate	2466-09-3	H4O7P2	Non-metal oxoanionic compounds	0.013182	4.343
ESCULETIN	305-01-1	C9H6O4	Coumarins	0.0194745	4.44653
Uric acid	69-93-2	C5H4N4O3	Imidazopyrimidines	0.0896135	7.64028
2'-Deoxyinosine;Deoxyinosine	890-38-0	C10H12N4O4	Nucleotide and its derivates	0.0338348	14.4687
Glucosamine 6-phosphate	3616-42-0	C6H14NO8P	Organooxygen compounds	0.109365	5.40364
Deoxyguanosine	961-07-9	C10H13N5O4	Nucleotide and its derivates	0.0389373	55.7441
Ellagic acid	476-66-4	C14H6O8	Phenols	0.155068	0.236609
Tricetin	1621-84-7;520-31-0	C15H10O7	Flavonoids	0.0302169	15.0709
Myricetin	529-44-2	C15H10O8	Flavonoids	0.0818547	83.4619
N-Acetyl-L-phenylalanine	2018-61-3	C11H13NO3	Amino acid and derivatives	0.0735588	0.732785
Isoscopoletin;Scopoletin	776-86-3;92-61-5	C10H8O4	Coumarins;Phenylpropanoids	0.0486858	2.90453
Oxypeucedanin	737-52-0;26091-73-6	C16H14O5	Coumarins	0.079768	13.2135
Pyrrole-2-carboxylic acid	634-97-9	C5H5NO2	Amino acid and derivatives	0.0877589	2.20549
D-alpha-Aminobutyric acid	2623-91-8	C4H9NO2	Carboxylic acids and derivatives	0.0624887	1.29419
S-(5'-Adenosy)-L-homocysteine	979-92-0	C14H20N6O5S	Amino acid and derivatives	0.0975957	0.0170261
Carbendazim	10605-21-7	C9H9N3O2	Benzimidazoles	0.0725822	0.0803251
2,5-Dihydroxybenzaldehyde	1194-98-5	C7H6O3	Phenols	0.0120387	10.1629
Styrene-cis-2,3-dihydrodiol		C8H10O2		0.121262	3.4554
Venlafaxine	93413-69-5	C17H27NO2	Phenol ethers	0.0635935	2.03006
Adenosine	58-61-7	C10H13N5O4	Nucleotide and its derivates	0.0428087	0.564694
2-Hydroxycinnamic acid	583-17-5;614-60-8	C9H8O3	Phenylpropanoids	0.119506	0.355367
4-Isopropylbenzaldehyde	122-03-2	C10H12O	Phenols	0.0725822	2.29222
Guanine	73-40-5	C5H5N5O	Nucleotide and its derivates	0.109365	1.58316
5-oxoproline	98-79-3	C5H7NO3	Amino acid and derivatives	0.0120387	1.75692
2-(Methylamino)benzoic acid	119-68-6	C8H9NO2	Benzene and substituted derivatives	0.0980325	28.028
Pimelic acid	111-16-0	C7H12O4	Fatty Acyls	0.0588285	1.63542
Itaconic acid	97-65-4	C5H6O4	Fatty Acyls	0.0908543	1.53692
2-Phenylacetamide	103-81-1	C8H9NO	Benzene and substituted derivatives	0.100237	1.33634
3-Hydroxypicolinic acid	874-24-8	C6H5NO3	Pyridines and derivatives	0.157294	1.70027
Delta-Nonalactone	3301-94-8	C9H16O2	Miscellaneous	0.0925015	1.42366
L-Gulose	6027-89-0	C6H12O6	Carbohydrates	0.0287581	3.06049
4-Sulfobenzoate	636-78-2	C7H6O5S		0.0611435	3.93182
N-Methylcytisine	486-86-2	C12H16N2O	Alkaloids	0.0409385	2.03285
Coniferylaldehyde	458-36-6	C10H10O3	Phenylpropanoids	0.0725822	5.01999
N-Acetyl-L-glutamic acid	1188-37-0	C7H11NO5	Amino acid and derivatives	0.0877589	1.94949
Altechromone A	38412-47-4	C11H10O3	Phenols	0.0126629	2.64541
Bornyl acetate	5655-61-8	C12H20O2	Monoterpenoids	0.0624887	1.84574
Jasmonic acid	6894-38-8	C12H18O3	Fatty Acyls	0.0126629	2.15372
Lumichrome	1086-80-2	C12H10N4O2	Alkaloids	0.0771428	0.602882
Pelargonidin	7690-51-9;134-04-3	C15H10O5	Flavonoids	0.0900197	6.26253
3',4',7-Trihydroxyisoflavone	485-63-2	C15H10O5	Flavonoids	0.0287581	6.14067
9-Methoxy-alpha-lapachone	35241-80-6	C16H16O4	Quinones	0.0172438	4.03651
2',6'-Dihydroxy 4'-methoxydihydrochalcone	35241-55-5	C16H16O4	Chalcones	0.0896135	2.37922
Garbanzol	1226-22-8	C15H12O5	Flavonoids	0.0225454	7.47567
5'-S-Methyl-5'-thioadenosine	2457-80-9	C11H15N5O3S	Nucleotide and its derivates	0.109365	0.012258
3-Methyl-2-oxovaleric acid	1460-34-0	C6H10O3	Keto acids and derivatives	0.0183785	0.342598
Delphinidin	528-53-0	C15H10O7	Flavonoids	0.0637696	4.76719
Robinetin	490-31-3	C15H10O7	Flavonoids	0.0144759	13.2821
Adenosine 3'-monophosphate	84-21-9	C10H14N5O7P	Nucleotide and its derivates	0.134139	0.0526499
Evoxine	522-11-2	C18H21NO6	Alkaloids	0.157294	1.76016
2-Methoxy-4-vinylphenol	7786-61-0	C9H10O2	Phenols	0.0818547	0.735773
Kirenol	52659-56-0	C20H34O4	Diterpenoids	0.0877589	2.17912
Dopamine glucuronide	38632-24-5	C14H19NO8	Organooxygen compounds	0.0971649	3.71316
Tabersonine	4429-63-4	C21H24N2O2	Alkaloids	0.121737	1.82338
Nemorensine	50906-96-2	C18H27NO5	Alkaloids	0.0333294	1.6658
Phenylacetic acid;4-Methylbenzoic acid;M-toluic Acid	103-82-2;99-94-5;99-04-7	C8H8O2	Benzene and substituted derivatives	0.0215475	4.84654
Hypoxanthine	68-94-0	C5H4N4O	Nucleotide and its derivates	0.0128424	1.64876
Daidzein	486-66-8	C15H10O4	Flavonoids	0.148618	1.6467
4',7-Dihydroxyflavone	2196-14-7	C15H10O4	Flavonoids	0.133116	2.23993
5,6-DHET	213382-49-1	C20H34O4	Fatty Acyls	0.134139	2.49404
Guanosine 3',5'-cyclic monophosphate	7665-99-8	C10H12N5O7P	Nucleotide and its derivates	0.0725822	8.10024
1-Caffeoylquinic acid	1241-87-8	C16H18O9	Phenylpropanoids	0.079768	1.43592
Rosmarinic acid	537-15-5;20283-92-5	C18H16O8	Phenylpropanoids	0.148581	0.434614
Benzoic acid	65-85-0	C7H6O2	Phenols	0.0270749	0.664385
Nicotinamide	98-92-0	C6H6N2O	Alkaloids	0.00660698	0.0839387
Tabernanthine	83-94-3	C20H26N2O	Alkaloids	0.112367	1.44205
Juglone	481-39-0	C10H6O3	Quinones	0.0537376	2.88303
6(1H)-Azulenone, 2,3-dihydro-1,4-dimethyl	71305-89-0	C12H14O	Miscellaneous	0.0818547	3.19336
Canthaxanthin	514-78-3	C40H52O2	Prenol lipids	0.0215475	0.325485
L-Nicotine	54-11-5	C10H14N2	Alkaloids	0.0281113	0.152998
Methyl cinnamate	103-26-4	C10H10O2	Phenylpropanoids	0.148581	1.81584
4-Methoxycinnamaldehyde	1963-36-6	C10H10O2	Phenylpropanoids	0.0877589	1.88338
Glucose 1-phosphate	59-56-3	C6H13O9P	Organooxygen compounds	0.0900197	1.1786
Mannose 6-phosphate		C6H13O9P	Organooxygen compounds	0.079768	1.22838
vitamin K2	11032-49-8	C41H56O2	Vitamins	0.0725822	0.366513
Oleamide	301-02-0	C18H35NO	Fatty Acyls	0.0725822	1.40368
(+)-Glaucarubinone	1259-86-5	C25H34O10	Diterpenoids	0.155068	2.60756
Salvianolic acid A	96574-01-5	C26H22O10	Phenylpropanoids	0.133116	3.59574
Alpha-Santonin	481-06-1	C15H18O3	Sesquiterpenoids	0.122148	0.528224
Deoxyelephantopin	29307-03-7	C19H20O6	Sesquiterpenoids	0.0144759	8.96185
Methyl gallate	99-24-1	C8H8O5	Phenols	0.0126629	2.08412
cis-3-(Carboxy-ethyl)-3,5-cyclo-hexadiene-1,2-diol		C9H12O4		0.0363464	2.69106
Artemisinin	63968-64-9	C15H22O5	Sesquiterpenoids	0.134665	1.138
4-Guanidinobutyric acid	463-00-3	C5H11N3O2	Organic acids	0.0818547	1.60525
Chimonanthine	5545-89-1	C22H26N4	Alkaloids	0.0925015	47.3084
Taraxasterone	6786-16-9	C30H48O	Triterpenoids	0.0120387	4.39373
Ferulic acid; Trans-Ferulic acid;trans-Ferulic acid	1135-24-6;537-98-4	C10H10O4	Phenylpropanoids	0.0126629	0.465551
L-Quebrachitol	642-38-6	C7H14O6	Miscellaneous	0.0933879	2.25414
Zingerone	122-48-5	C11H14O3	Phenols	0.104371	0.382622
Lycorine	476-28-8	C16H17NO4	Alkaloids	0.0975957	13.9931
Pipermethystine	71627-22-0	C16H17NO4	Alkaloids	0.0624887	20.0631
Brucine	4845-99-2;357-57-3	C23H26N2O4	Alkaloids	0.0624887	6.81632
2-Hydroxy-3-(4-hydroxyphenyl)propenoic acid		C9H8O4	Benzene and substituted derivatives	0.0197402	1.62907
Glutathione oxidized	27025-41-8	C20H32N6O12S2	Amino acid and derivatives	0.0635935	0.0127366
11-Keto-beta-boswellic acid	17019-92-0	C30H46O4	Triterpenoids	0.121737	0.412133
Esculin	531-75-9	C15H16O9	Coumarins	0.0311215	0.050293
Cephalotaxine	24316-19-6	C18H21NO4	Alkaloids	0.0141711	2.32619
Agrocybenine	178764-92-6	C12H18N2O	Alkaloids	0.157257	0.788662
Glutathione	70-18-8	C10H17N3O6S	Amino acid and derivatives	0.00660698	0.193395
N1-Methyl-2-pyridone-5-carboxamide	701-44-0	C7H8N2O2	Pyridines and derivatives	0.0896135	1.60886
N1-Methyl-4-pyridone-3-carboxamide	769-49-3	C7H8N2O2	Pyridines and derivatives	0.0534253	1.45094
Vanillin	121-33-5	C8H8O3	Phenols	0.142596	0.733797
3-(4-Hydroxyphenyl)-1-propanol	10210-17-0	C9H12O2	Phenylpropanoids	0.0975957	2.40928
Cleomiscosin A	76948-72-6	C20H18O8	Coumarins	0.0197402	0.392143
trans-Hinokiresinol	17676-24-3	C17H16O2	Lignans	0.134139	1.9454
Morusin	62596-29-6	C25H24O6	Flavonoids	0.0194745	5.97772
Benzyl cinnamate	103-41-3	C16H14O2	Phenylpropanoids	0.0896135	2.43096
Deltaline	3836-11-9;6836-11-9	C27H41NO8	Alkaloids	0.0799099	2.08685
Morroniside	25406-64-8	C17H26O11	Iridoids	0.0725822	4.69442
Pelargonidin-3,5-O-diglucoside chloride	17334-58-6	C27H30O15	Flavonoids	0.0120387	5.83082
Veraguensin	19950-55-1	C22H28O5	Lignans	0.0197402	2.08614
Syringin	118-34-3	C17H24O9	Phenylpropanoids	0.0585913	0.429051
5-Carboxyvanillic acid	2134-91-0	C9H8O6		0.103826	1.8658
Plumieride	511-89-7	C21H26O12	Iridoids	0.121262	5.27625
Geniposidic acid;Geniposidic acid	27741-01-1	C16H22O10	Iridoids;Terpene	0.0357334	29.3826
8-Hydroxypinoresinol	81426-17-7	C20H22O7	Lignans	0.0209523	4.52402
Genistin;Genistein 7-O-Glucoside (Genistin)	529-59-9	C21H20O10	Flavonoids	0.00792336	0.242633
Peonidin-3-glucoside	68795-37-9	C22H22O11	Flavonoids	0.0120387	0.213924
7-Hydroxyflavanone	6515-36-2	C15H12O3	Flavonoids	0.0624887	2.5473
Plantagoside	78708-33-5	C21H22O12	Flavonoids	0.0818547	51.0978
12-O-tetradecanoylphorbol-13-acetate	16561-29-8	C36H56O8	Diterpenoids	0.0877589	1.77222
Chondroitin sulfate	9007-28-7	C13H21NO15S	Miscellaneous	0.0120387	0.376326
cis-2-Methylaconitate	6061-93-4	C7H8O6	Carboxylic acids and derivatives	0.0992964	1.91896
Methoxyindoleacetic acid	3471-31-6	C11H11NO3	Indoles and derivatives	0.0287581	1.54109
Dicentrine	517-66-8	C20H21NO4	Alkaloids	0.109365	0.598876
Sinapine	18696-26-9	C16H23NO5	Cholines	0.0725822	3.5272
Fulvine	6029-87-4	C16H23NO5	Alkaloids	0.0925015	2.57535
10-Deacetylbaccatin III	32981-86-5	C29H36O10	Diterpenoids	0.0126629	0.261648
1-Naphthol	90-15-3	C10H8O	Naphthalenes	0.142768	1.76823
N,N-Dimethylaniline	121-69-7	C8H11N	Organonitrogen compounds	0.134139	0.444939
Ganoderic acid D2	97653-94-6	C30H42O8	Triterpenoids	0.142596	1.79577
(+)-Lyoniresinol 9'-O-glucoside	87585-32-8	C28H38O13	Lignans	0.027279	0.181113
Glucocheirolin	15592-36-6	C11H21NO11S3	Miscellaneous	0.079768	4.80606
Quercetin-3-O-glucuronide	22688-79-5	C21H18O13	Flavonoids	0.0375514	0.0352677
Karacoline	39089-30-0	C22H35NO4	Alkaloids	0.0709673	3.04394
Arachidonic acid	506-32-1	C20H32O2	Fatty Acyls	0.0725822	11.3259
Dihydrorobinetin	4382-33-6	C15H12O7	Flavonoids	0.0363464	2.62481
Ganoderic acid L	102607-24-9	C30H46O8	Alkaloids	0.0818547	0.409846
trans-3,5-Dimethoxy-4-hydroxy cinnamaldehydee	4206-58-0	C11H12O4	Phenylpropanoids	0.00383229	0.28756
Primin	15121-94-5	C12H16O3	Quinones	0.0975957	0.322613
Cimifugin	37921-38-3	C16H18O6	Flavonoids	0.0516833	1.94418
(+)-Affinisine	2912-11-0	C20H24N2O	Alkaloids	0.0925015	1.94788
Doronine	60367-00-2	C21H30ClNO8	Alkaloids	0.0975957	0.740822
Convolvine	537-30-4	C16H21NO4	Alkaloids	0.0725822	3.18455
Topotecan	123948-87-8	C23H23N3O5	Alkaloids	0.059443	2.65712
Benzofuran	271-89-6	C8H6O	Benzofurans	0.0363464	0.540923
Yatein	40456-50-6	C22H24O7	Lignans	0.121262	2.10165
Sweroside	14215-86-2	C16H22O9	Iridoids;Terpene	0.027279	2.56479
Tuberostemonine	6879-01-2	C22H33NO4	Alkaloids	0.0818547	1.39451
Methylisopelletierine	18747-42-7	C9H17NO	Alkaloids	0.0162014	0.108742
Salviaflaside	178895-25-5	C24H26O13	Phenylpropanoids	0.0975957	0.515428
Physalin C	27503-33-9	C28H30O9	Steroids	0.0204415	8.77987
Inosine	58-63-9	C10H12N4O5	Nucleotide and its derivates	0.0248338	0.169128
Ganoderal A	104700-98-3	C30H44O2	Triterpenoids	0.148581	7.43113
Mulberrofuran Q	101383-35-1	C34H24O10	Phenols	0.122148	2.17229
Undecanolactone	710-04-3	C11H20O2	Miscellaneous	0.0544847	1.73877
Pyridoxine	65-23-6	C8H11NO3	Vitamins	0.0120387	0.0456701
Punicalin	65995-64-4	C34H22O22	Phenols	0.0975957	3.41674
Hecogenin	467-55-0	C27H42O4	Steroids and steroid derivatives	0.121262	0.289124
Mimosine	500-44-7	C8H10N2O4	Alkaloids	0.0624887	3.56896
Leukotriene A4	72059-45-1	C20H30O3	Fatty Acyls	0.148581	0.380597
Xanthosine	146-80-5	C10H12N4O6	Nucleotide and its derivates	0.0588285	1.47974
Prunetin	552-59-0	C16H12O5	Flavonoids	0.0128424	0.266665
N-γ-Acetyl-N-2-Formyl-5-methoxykynurenamine	52450-38-1	C13H16N2O4	Amino acid and derivatives	0.0325532	3.45255
5-Aminolevulinate	106-60-5	C5H9NO3	Organic acids	0.0877589	0.253608
Riboflavine	83-88-5	C17H20N4O6	Vitamins	0.0893133	5.1436
Tripdiolide	38647-10-8	C20H24O7	Diterpenoids	0.114257	4.97412
Asebogenin	520-42-3	C16H16O5	Chalcones	0.091671	13.6522
Fustin	20725-03-5	C15H12O6	Flavonoids	0.0983931	19.1757
Nordihydroguaiaretic acid	500-38-9	C18H22O4	Lignans	0.0725822	36.2317
2(3H)-Benzothiazolethione	149-30-4	C7H5NS2	Benzothiazoles	0.059443	3.0296
Simvastatin	79902-63-9	C25H38O5	Diterpenoids	0.1356	0.493843
Betulalbuside A	64776-96-1	C16H28O7	Monoterpenoids	0.00351137	13.2346
Ephedrine	299-42-3	C10H15NO	Benzene and substituted derivatives	0.00660698	6.29315
(R)-2-Hydroxy-2H-1,4-benzoxazin-3(4H)-one		C8H7NO3	Benzoxazines	0.0120387	6.01904
Hordenine	539-15-1	C10H15NO	Alkaloids	0.0880122	1.41443
Kaempferol 3-O-beta-sophoroside;Cyanin	19895-95-5;2611-67-8;20905-74-2	C27H30O16	Flavonoids	0.134139	3.46399
(-)-Borneol;(+)-Borneol	464-45-9;464-43-7	C10H18O	Monoterpenoids	0.0144759	0.353621
Beta-D-Glucose;alpha-D-Glucose	492-61-5;492-62-6	C6H12O6	Organooxygen compounds	0.0126629	3.50634
Ortho-Hydroxyphenylacetic acid;1,2-Epoxy-p-menth-8-ene	614-75-5;1195-92-2	C8H8O3;C10H16O	Benzene and substituted derivatives;Oxepanes	0.0270749	2.10491
(-)-Fenchone	7787-20-4	C10H16O	Monoterpenoids	0.00792336	0.406225
Gamabufotalin;Telocinobufagin	465-11-2;472-26-4	C24H34O5	Steroids	0.0980325	0.118358
alpha-Cyperol;Alismol;Spathulenol	20084-99-5;87827-55-2;6750-60-3	C15H24O	Prenol lipids;Sesquiterpenoids	0.148075	1.74784
